# Supplementary material
Source: PubMed Central journal article supplement (PMC4790500)
Supplement: fazs000760.wf1_default.pdf [file fazs000760.wf1_default.pdf]

**Web figure 1:** Results of a systematic search conducted to identify replication studies of nine commonly used risk assessment tools

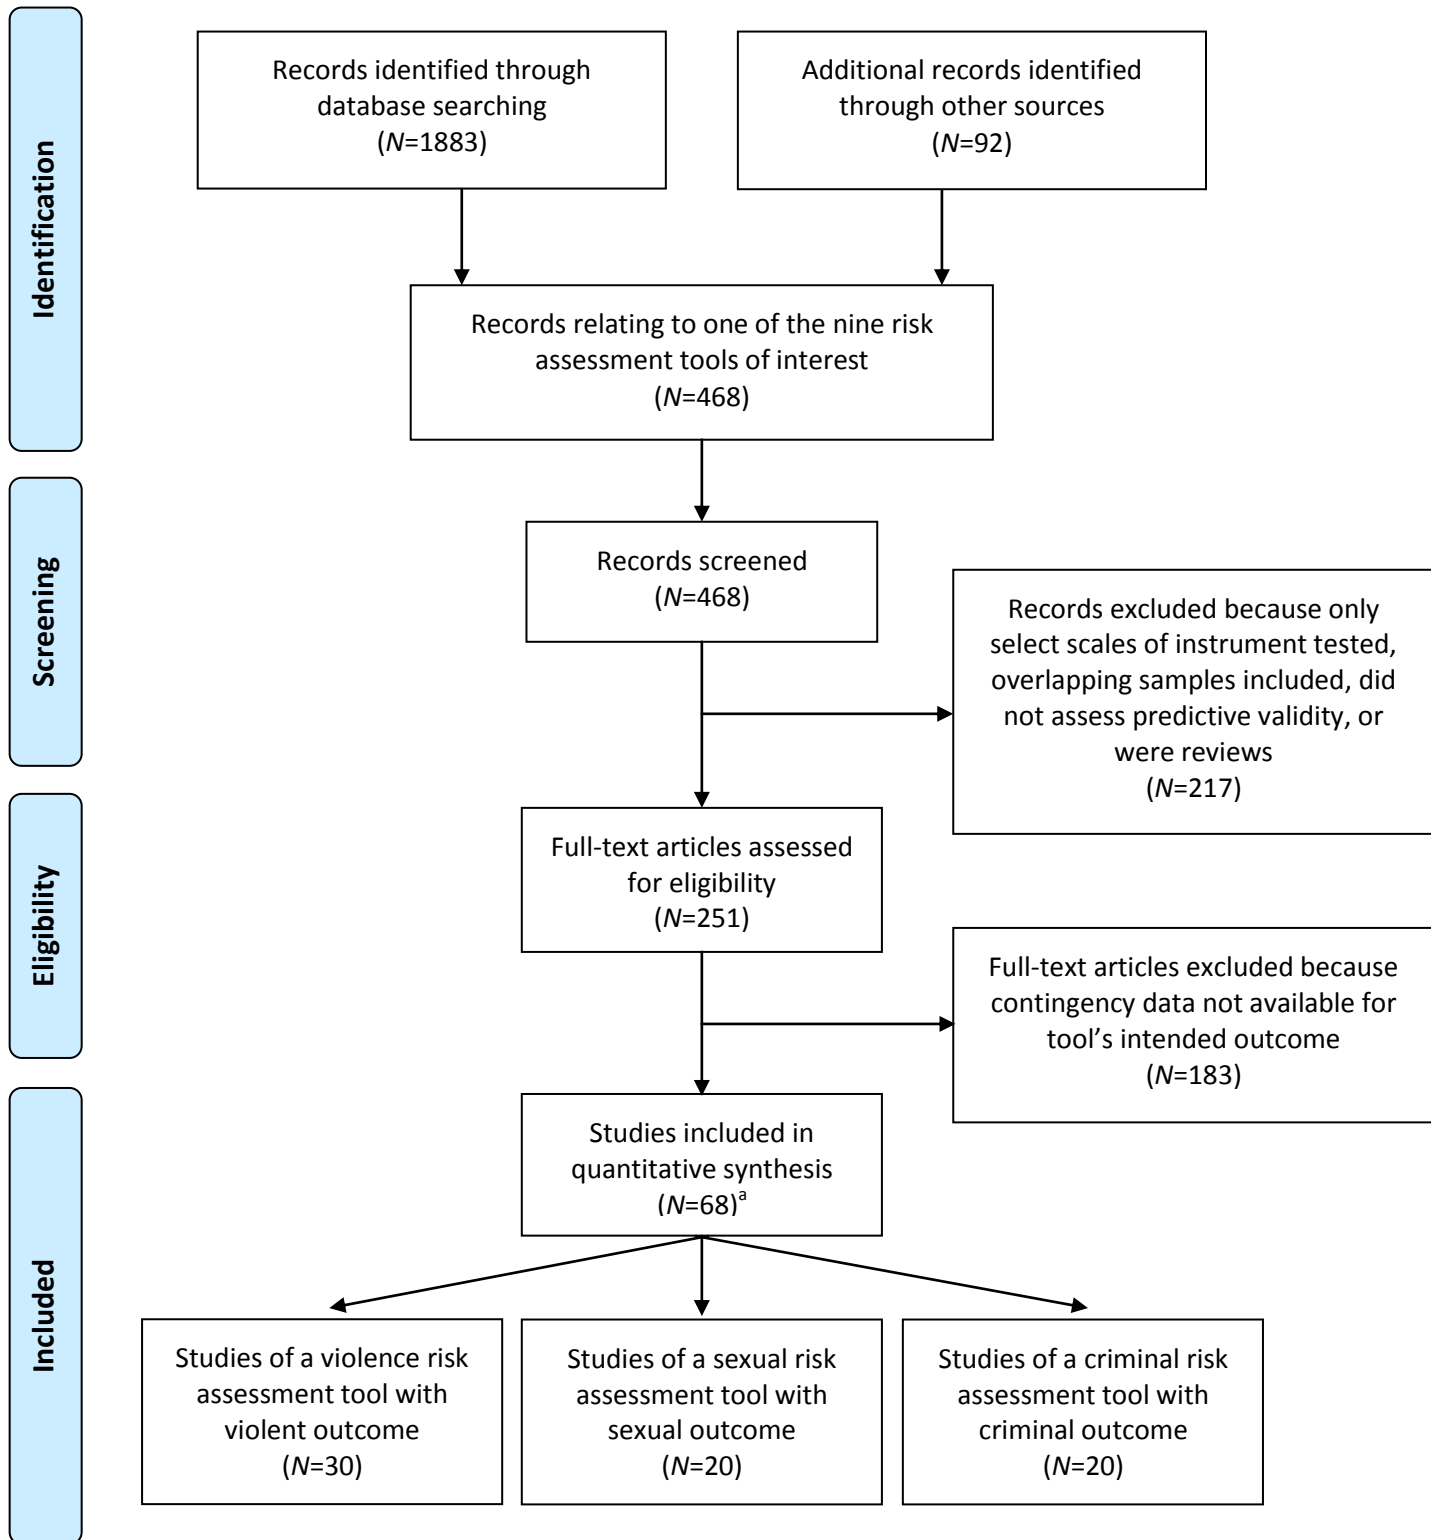

<sup>a</sup>Two studies contributed samples to both sexual and criminal risk assessment tools.
