# Supplementary material
Source: PubMed Central journal article supplement (PMC4790500)

**Web figure 2:** Distribution of effect sizes (reported as Cohen's d) in studies included and not included in the current systematic review

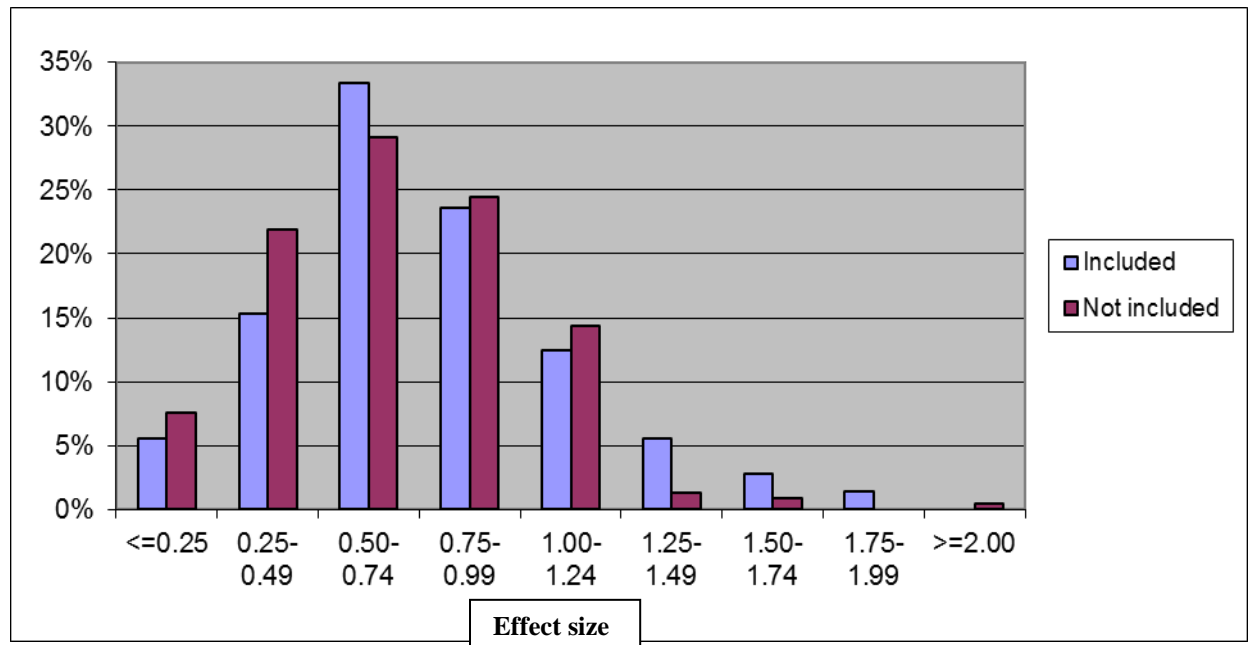

Supplement: fazs000760.wf2_default.pdf [file fazs000760.wf2_default.pdf]
