# Supplementary material
Source: PubMed Central journal article supplement (PMC4790500)

**Web figure 3:** Summary receiver operator characteristic curve from bivariate analysis of individual violence risk assessment tools

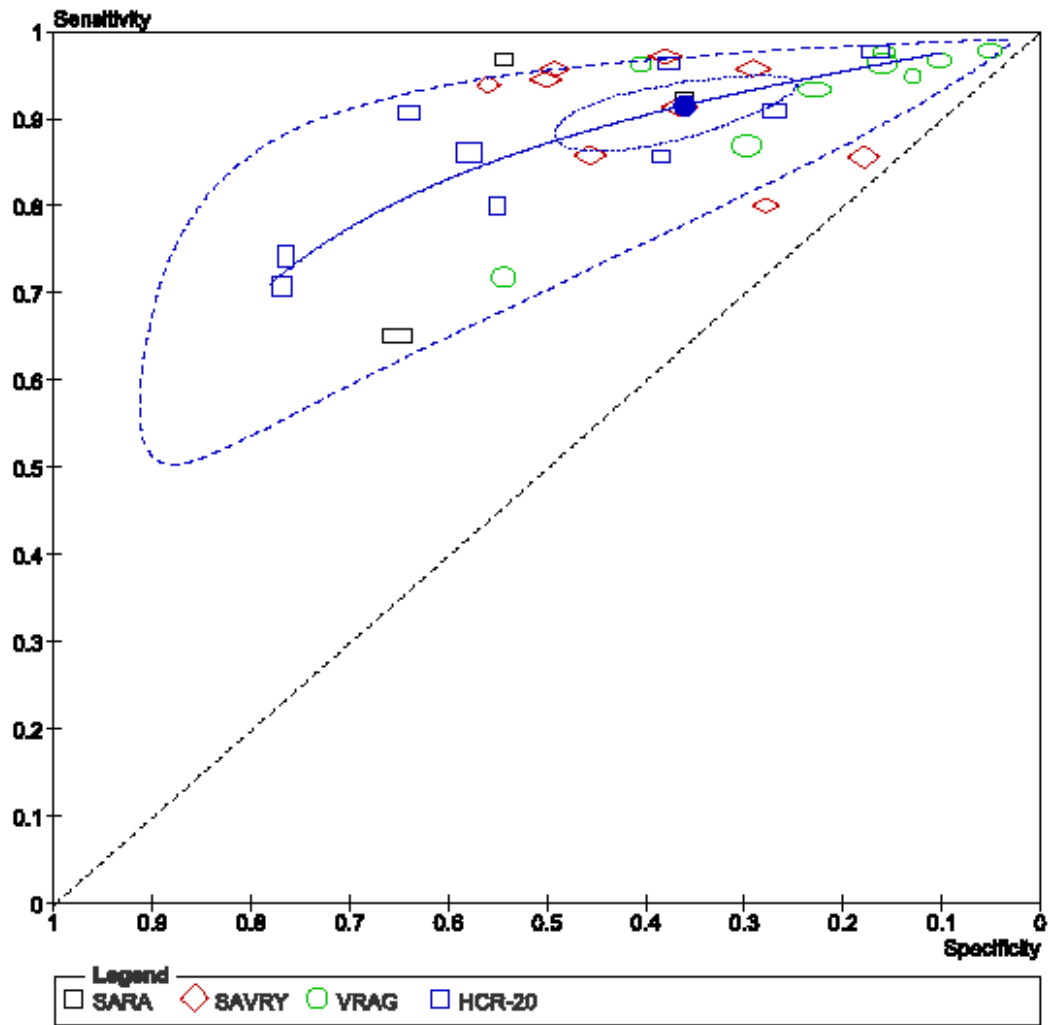

Supplement: fazs000760.wf3_default.pdf [file fazs000760.wf3_default.pdf]
