# Supplementary material
Source: PubMed Central journal article supplement (PMC4790500)

**Web figure 4:** Summary receiver operator characteristic curve from bivariate analysis of individual sexual risk assessment tools

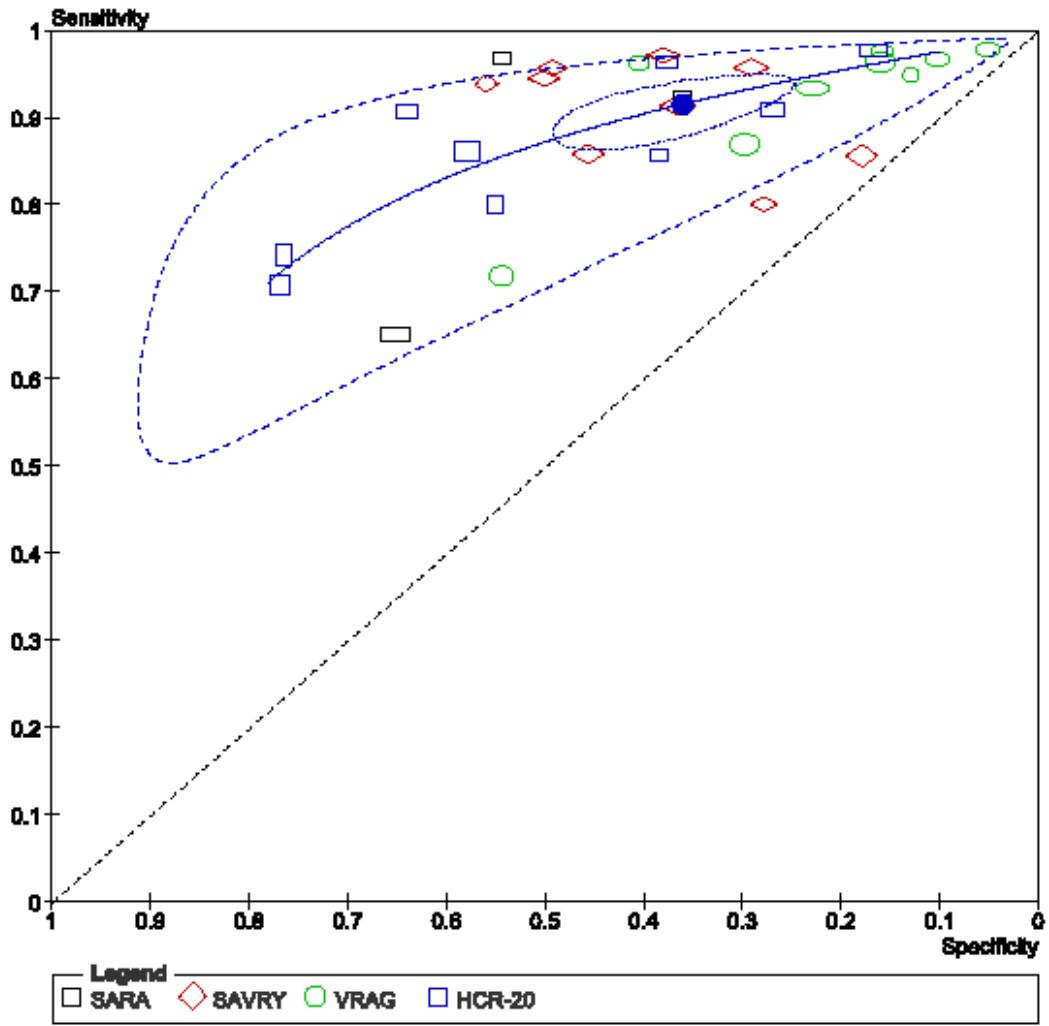

Supplement: fazs000760.wf4_default.pdf [file fazs000760.wf4_default.pdf]
