# Supplementary material
Source: PubMed Central journal article supplement (PMC4790500)

**Web figure 5:** Summary receiver operator characteristic curve from bivariate analysis of individual criminal risk assessment tools

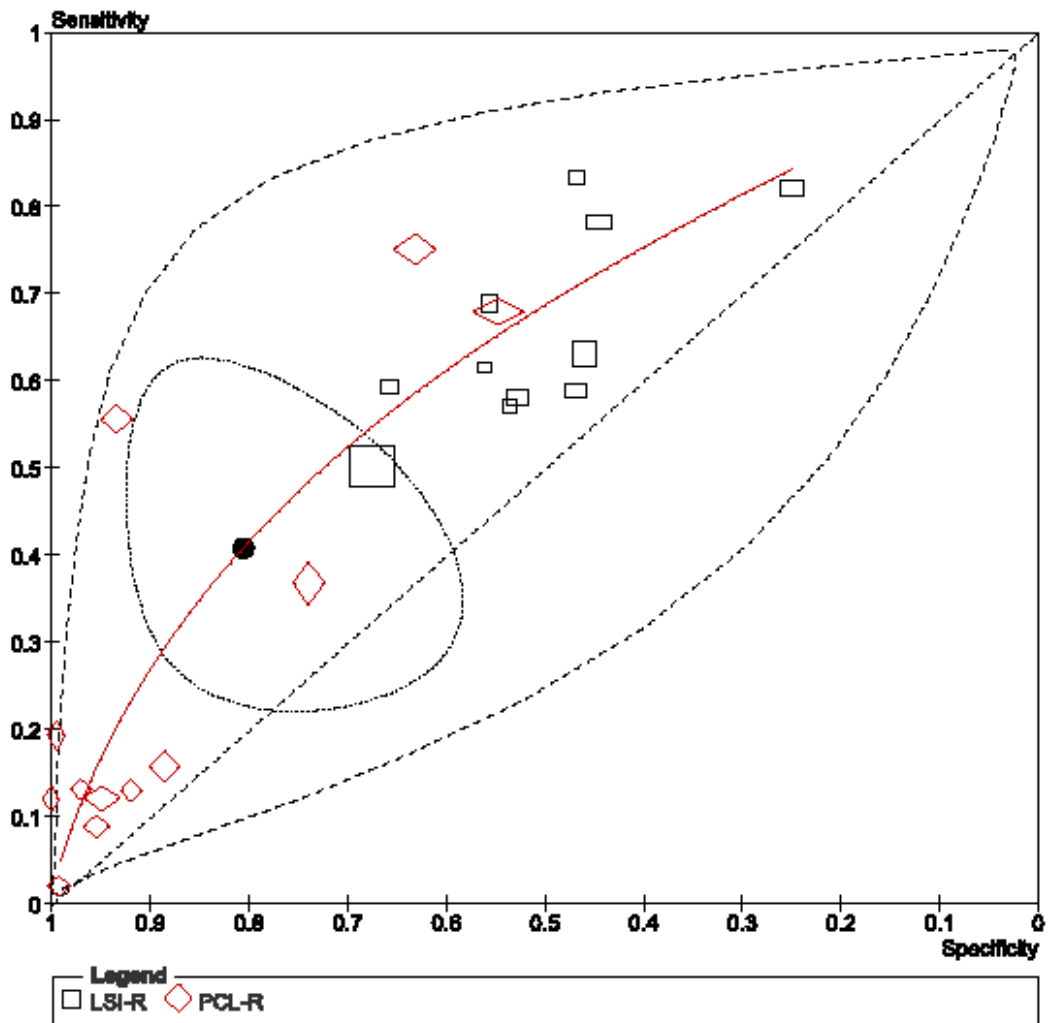

Supplement: fazs000760.wf5_default.pdf [file fazs000760.wf5_default.pdf]
