# Supplementary material
Source: PubMed Central journal article supplement (PMC4790500)
Supplement: fazs000760.wt1_default.pdf [file fazs000760.wt1_default.pdf]

**Web table 1:** Comparison of summary accuracy estimates produced by three types of risk assessment tools when moderate risk individuals were classified as low risk

| Accuracy estimate                                         | Violent offending (n=30) <sup>a</sup> | Sexual offending (n=20) <sup>b</sup> | Criminal offending (n=23) <sup>c</sup> |
|-----------------------------------------------------------|---------------------------------------|--------------------------------------|----------------------------------------|
| <b>Summary estimates from SROC curve</b>                  |                                       |                                      |                                        |
| DOR (95% CI)                                              | 6.56 (4.73 to 9.10)                   | 3.98 (2.78 to 5.70)                  | 3.06 (2.13 to 4.38)                    |
| Sens (95% CI)                                             | 0.51 (0.44 to 0.59)                   | 0.39 (0.31 to 0.48)                  | 0.20 (0.14 to 0.28)                    |
| Spec (95% CI)                                             | 0.86 (0.82 to 0.89)                   | 0.86 (0.80 to 0.91)                  | 0.92 (0.88 to 0.95)                    |
| <b>Medians and IQRs of the individual study estimates</b> |                                       |                                      |                                        |
| AUC (IQR)                                                 | 0.72 (0.68-0.78)                      | 0.74 (0.66-0.77)                     | 0.66 (0.58-0.67)                       |
| PPV (IQR)                                                 | 0.62 (0.42-0.84)                      | 0.25 (0.16-0.43)                     | 0.54 (0.44-0.60)                       |
| NPV (IQR)                                                 | 0.78 (0.65-0.90)                      | 0.90 (0.81-0.97)                     | 0.74 (0.58-0.84)                       |
| NND (IQR)                                                 | 2 (1-2)                               | 4 (2-6)                              | 2 (2-3)                                |
| NSD (IQR)                                                 | 4 (2-9)                               | 9 (4-30)                             | 3 (1-6)                                |

Notes: n=number of samples; SROC=summary receiver operating characteristic curve; DOR=diagnostic odds ratio; AUC=area under the curve; Sens=sensitivity; Spec=specificity; PPV=positive predictive value; NPV=negative predictive value; NND=number needed to detain; NSD=number safely discharged; CI=confidence interval; IQR=interquartile range.

<sup>a</sup>HCR-20, SARA, SAVRY, and VRAG.

<sup>b</sup>SORAG, Static-99, and SVR-20.

<sup>c</sup>LSI-R and PCL-R.
