# Supplementary material
Source: PubMed Central journal article supplement (PMC4790500)
Supplement: fazs000760.ww1_default.pdf [file fazs000760.ww1_default.pdf]

## **Web appendix: Studies included in quantitative synthesis**

1. Arbach K, Pueyo AA. Violence risk assessment in mental disorders with the HCR-20. *Papeles del Psicologo* 2007;28:174-186.
2. Austin J, Coleman D, Peyton J, Johnson KD. *Reliability and validity study of the LSI-R risk assessment instrument*. Washington, DC: Pennsylvania Board of Probation and Parole, 2003.
3. Beggs SM, Grace RC. Psychopathy, intelligence, and recidivism in child molesters: evidence of an interaction effect. *Crim Justice Behav* 2008;35:683-695.
4. Bengtson S. Is newer better? A cross-validation of the Static-2002 and the Risk Matrix 2000 in a Danish sample of sexual offenders. *Psychol Crim Law* 2008;14:85-106.
5. Caperton JD. *Predicting recidivism among sex offenders: utility of the STATIC-99, Minnesota Sex Offender Screening Tool – Revised, and Psychopathy Checklist – Revised*. Huntsville, TX: Sam Houston State University, 2005.
6. Dahle KP. Strengths and limitations of actuarial prediction of criminal reoffense in a German prison sample: a comparative study of LSI-R, HCR-20 and PCL-R. *Int J Law Psychiatr* 2006;29:431-442.
7. Davidson J. *Risky business: what standard assessments mean for female offenders*. Manoa, HI: University of Hawaii, 2007.
8. de Vogel V, de Ruiter C. The HCR-20 in personality disordered female offenders: a comparison with a matched sample of males. *Clin Psychol Psychother* 2005;12:226-240.

9. de Vogel V, de Ruiter C, van Beek, Mead G. Predictive validity of the SVR-20 and Static-99 in a Dutch sample of treated sex offenders. *Law Hum Behav* 2004;28:235-251.
10. Dempster RJ. *Prediction of sexually violent recidivism: a comparison of risk assessment instruments*. Burnaby, BC: Simon Fraser University, 1998.
11. Dempster RJ. *Understanding errors in risk assessment: the application of differential prediction methodology*. Burnaby, BC: Simon Fraser University, 2001.
12. Douglas KS, Ogloff JRP, Hart SD. Evaluation of a model of violence risk assessment among forensic psychiatric patients. *Psychiatr Serv* 2003;54:1372-1379.
13. Douglas KS, Yeomans M, Boer DP. Comparative validity analysis of multiple measures of violence risk in a sample of criminal offenders. *Crim Justice Behav* 2005;32:479-510.
14. Dowdy ER, Lacy MG, Unnithan NP. Correctional prediction and the Level of Supervision Inventory. *J Crim Justice* 2002;30:29-39.
15. Eher R, Rettenberger M, Matthes A. *Aktuarische prognose bei Sexualstraftaetern*. [Actuarial predictions of sexual offenders]. *M Schr Krim* 2009;92:18-27.
16. Fass TL, Heilbrun K, DeMatteo D, Fretz R. The LSI-R and the COMPAS: validation data on two risk-needs tools. *Crim Justice Behav* 2008;35:1095-1108.
17. Friendship C, Mann RE, Beech AR. Evaluation of a national prison-based treatment program for sexual offenders in England and Wales. *J Interpers Viol* 2003;18:744-759.

18. Gammelgård M, Koivisto AM, Eronen M, Kaltiala-Heino R. The predictive validity of the Structured Assessment of Violence Risk in Youth (SAVRY) among institutionalised adolescents. *J Forensic Psychiatr Psychol* 2008;19:352-370.
19. Gibas AL, Kropp PR, Hart SD, Stewart L. *Validity of the SARA in a Canadian sample of incarcerated adult males*. Proceedings of the International Association of Forensic Mental Health Services, 2008 July, Vienna, Austria, 2008.
20. Grann M, Belfrage H, Tengström A. Actuarial assessment of risk for violence: predictive validity of the VRAG and the historical part of the HCR-20. *Crim Justice Behav* 2000;27:97-114.
21. Gretton H, Abramowitz C. *SAVRY: contribution of items and scales to clinical risk judgements and criminal outcomes*. Proceedings of the American Psychology-Law Society, 2002 Mar, Austin, TX, 2002.
22. Harris GT, Rice ME, Quinsey VL, Lalumiere ML, Boer D, Lang C. A multisite comparison of actuarial risk instruments for sex offenders. *Psychol Assess* 2003;15:413-425.
23. Helmus LMD, Hanson RK. Predictive validity of the Static-99 and Static-2002 for sex offenders on community supervision. *Sex Offender Treat* 2007;2:1-14.
24. Hill A, Habermann N, Klusmann D, Berner W, Briken P. Criminal recidivism in sexual homicide perpetrators. *Int J Offender Ther Comp Criminol* 2008;52:5-20.
25. Ho H, Thomson L, Darjee R. Violence risk assessment: the use of the PCL-SV, HCR-20, and VRAG to predict violence in mentally disordered offenders

- discharged from a medium secure unit in Scotland. *J Forensic Psychiatr Psychol* 2009;4:523-541.
26. Hollin CR, Palmer EJ. The Level of Service Inventory – Revised profile of English prisoners: risk and reconviction analysis. *Crim Justice Behav* 2006;33:347-366.
27. Jovanović AA, Toševski DL, Ivkonović M, Damjanović A, Gašić MJ. Predicting violence in veterans with posttraumatic stress disorder. *Vojnosanit Pregl* 2009;66:13-21.
28. Kelly CE, Welsh WN. The predictive validity of the Level of Service Inventory – Revised for drug-involved offenders. *Crim Justice Behav* 2008;35:819-831.
29. Kingston DA, Yates PM, Firestone P, Babchishin K, Bradford JM. Long-term predictive validity of the Risk Matrix 2000: a comparison with the Static-99 and the Sex Offender Risk Appraisal Guide. *Sex Abuse* 2008;20:466-484.
30. Kloezeman KC. *Violent behavior on inpatient psychiatric units: the HCR-20 violence risk assessment scheme*. Manoa, HI: University of Hawaii, 2004.
31. Kropp PR, Hart SD. The Spousal Assault Risk Assessment (SARA) guide: reliability and validity in adult male offenders. *Law Hum Behav* 2000;24:101-118.
32. Langton CM, Barbaree HE, Seto MC, Peacock EJ, Harkins L, Hansen KT. Actuarial assessment of risk for reoffense among adult sex offenders: evaluating the predictive accuracy of the Static-2002 and five other instruments. *Crim Justice Behav* 2007;34:37-59.
33. Langton CM. *Contrasting approaches to risk assessment with adult male sexual offenders: an evaluation of recidivism prediction schemes and the*

*utility of supplementary clinical information for enhancing predictive accuracy.* Toronto, ON: University of Toronto, 2003.

34. Lodewijks HPB, Doreleijers TAH, de Ruiter C. SAVRY risk assessment in violent Dutch adolescents: relation to sentencing and recidivism. *Crim Justice Behav* 2008;35:696-709.
35. Lodewijks HPB, de Ruiter C, Doreleijers TAH. Gender differences in violent outcome and risk assessment in adolescent offenders after residential treatment. *Int J Forensic Ment Health* 2008;7:105-141.
36. Lodewijks HPB, Doreleijers TAH, de Ruiter C, Borum R. Predictive validity of the Structured Assessment of Violence Risk in Youth (SAVRY) during residential treatment. *Int J Law Psychiatr* 2008;31:263-271.
37. Looman J, Abracen J. Comparison of measures of risk for recidivism in sexual offenders. *J Interpers Viol* 2010;25:791-807.
38. Manchak SM, Skeem JL, Douglas KS, Siranosian M. Does gender moderate the predictive utility of the Level of Service Inventory Revised (LSI-R) for serious violent offenders. *Crim Justice Behav* 2009;36:425-442.
39. Manchak SM, Skeem JL, Douglas KS. Utility of the revised Level of Service Inventory (LSI-R) in predicting recidivism after long-term incarceration. *Law Hum Behav* 2008;32:477-488.
40. McEachran A. *The predictive validity of the PCL:YV and the SAVRY in a population of adolescent offenders.* Burnaby, BC: Simon Fraser University, 2001.
41. Meyers JR, Schmidt F. Predictive validity of the Structured Assessment of Violence Risk in Youth (SAVRY) with juvenile offenders. *Crim Justice Behav* 2008;35:344-355.

42. Mills JF, Jones MN, Kroner DG. An examination of the generalizability of the LSI-R and VRAG probability bins. *Crim Justice Behav* 2005;32:565-585.
43. Mills JF, Kroner DG. The effect of discordance among violence and general recidivism risk estimates on predictive accuracy. *Crim Behav Ment Health* 2006;16:155-166.
44. Nicholls TL, Ogloff JRP, Ledwidge B. *Is the profound distrust of unbridled clinical opinion in the violence risk assessment field unfounded?* Proceedings of the 4th Annual Forensic Psychiatry Conference; 2007 Mar; Victoria, BC; 2007.
45. Pedersen L, Rasmussen K, Elsass P. Risk assessment: the value of structured professional judgments. *Int J Forensic Ment Health* 2010;9:74-81.
46. Pham TH, Ducro C, Marghem B, Réveillère C. *Evaluation du risque de recidive au sein d'une population de delinquants incarcères ou internes en Belgique francophone.* [Prediction of recidivism among prison inmates and forensic patients in Belgium]. *Annales Medico Psychol* 2005;163:842-845.
47. Pham TH, Ducro C, Marghem B. *Predicting recidivism among offenders populations in Belgium: The contribution of psychopathy to other risk assessment instruments.* Unpublished manuscript: Universite Catholique de Louvain, 2005.
48. Polvi NH. *The prediction of violence in pre-trial forensic patients: the relative efficacy of statistical versus clinical predictions of dangerousness.* Burnaby, BC: Simon Fraser University, 1999.
49. Ramirez MP, Illescas SR, Garcia MM, Forero CG, Pueyo AA. *Prediccion de riesgo de reincidencia en agresores sexuales.* [Predicting risk of recidivism in sexual offenders]. *Psicothema* 2008;20:205-210.

50. Reeves KA, Kropp PR, Cairns K. *An independent validation study of the SARA*. Proceedings of the International Association of Forensic Mental Health Services, 2008 July, Vienna, Austria, 2008.
51. Rettenberger M, Matthes A, Boer DP, Eher R. Prospective actuarial risk assessment: a comparison of five risk assessment instruments in different sexual offender subtypes. *Int J Offender Ther Comp Criminol* 2010;54:169-186.
52. Rice ME, Harris GT. Men who molest their sexually immature daughters: is a special examination required? *J Abnorm Psychol* 2002;111:329-339.
53. Serin RC, Mailloux DL, Malcolm PB. Psychopathy, deviant sexual arousal, and recidivism among sexual offenders. *J Interpers Viol* 2001;16:234-246.
54. Seto MC, Barbaree HE. Psychopathy, treatment behavior, and sex offender recidivism. *J Interpers Viol* 1999;14:1235-1248.
55. Simourd D. *Validation of risk/needs assessments in the Pennsylvania Department of Corrections*. Lower Allen, PA: Pennsylvania Department of Corrections, 2006.
56. Sjöstedt G, Långström N. Actuarial assessment of sex offender recidivism risk: a cross-validation of the RRASOR and the Static-99 in Sweden. *Law Hum Behav* 2001;25:629-645.
57. Sjöstedt G, Långström N. Assessment of risk for criminal recidivism among rapists: a comparison of four different measures. *Psychol Crim Law* 2002;8:25-40.
58. Snowden RJ, Gray NS, Taylor J, MacCulloch MJ. Actuarial prediction of violent recidivism in mentally disordered offenders. *Psychol Med* 2007;37:1539-1549.

59. Snowden RJ, Gray NS, Taylor J, Fitzgerald S. Assessing risk of future violence among forensic psychiatric inpatients with the Classification of Violence Risk (COVR). *Psychiatr Serv* 2009;60:1522-1526.
60. Soothill K, Harman J, Francis B, Kirby S. Identifying future repeat danger from sexual offenders against children: a focus on those convicted and those strongly suspected of such crime. *J Forensic Psychiatr Psychol* 2005;16:225-247.
61. Sreenivasan S, Garrick T, Norris R, Cusworth-Walker S, Weinberger LE, Essres G, et al. Predicting the likelihood of future sexual recidivism: pilot study findings from a California sex offender risk project and cross-validation of the Static-99. *J Am Acad Psychiatr Law* 2007;35:454-468.
62. Stadland C, Hollweg M, Kleindienst N, Dietl J, Reich U, Nedopil N, et al. *Rueckfallprognosen bei Sexualstraftaetern - Vergleich der praediktiven Validitaet von Prognoseinstrumenten*. [Predictions of recidivism in sexual offenders: comparison of the predictive validity of assessment tools]. *Nervenarzt* 2006;77:587-595.
63. Thornton D. Constructing and testing a framework for dynamic risk assessment. *Sex Abuse* 2002;14:139-153.
64. Viljoen JL, Scalora M, Cuadra L, Bader S, Chavez V, Ullman D, et al. Assessing risk for violence in adolescents who have sexually offended: a comparison of the J-SOAP-II, J-SORRAT-II, and SAVRY. *Crim Justice Behav* 2008;35:5-23.
65. Walkington Z, O'Keeffe C, Thomas S. *Predicting violence recidivism in violent juveniles: a UK trial*. London: HM Prison Service, 2006.



66. Walters G, Duncan S, Geyer M. Predicting disciplinary adjustment in inmates undergoing forensic evaluation: a direct comparison of the PCL-R and the PAI. *J Forensic Psychiatr Psychol* 2003;14:382-393.
67. Walters G, Knight RA, Grann M, Dahle KP. Incremental validity of the Psychopathy Checklist facet scores: predicting release outcome in six samples. *J Abnorm Psychol* 2008;117:396-405.
68. Wilcox D, Beech A, Markall HF, Blacker J. Actuarial risk assessment and recidivism in a sample of UK intellectually disabled sexual offenders. *Sex Aggress* 2009;15:97-106.
